# Supplementary material for: Alternative Epigenetic Chromatin States of Polycomb Target Genes
Source: PLoS Genet. 2010 Jan 8;6(1):e1000805. doi: 10.1371/journal.pgen.1000805 (PMC2799325; doi:10.1371/journal.pgen.1000805)
Supplement: Table S5 — Class II low-confidence PcG target genes. (0.05 MB XLS) [file pgen.1000805.s017.xls]

## Sheet: Sheet1
Table S5. Class II low-confidence PcG target genes*
Chromosome	Source	type	start	stop	strand	Symbol	FB gene ID	Annotation symbol
chr2L	FlyBase	mRNA	396595	402181	-	CG4213	FBgn0031251	CG4213
chr2L	FlyBase	mRNA	640021	714968	-	ds	FBgn0000497	CG17941
chr2L	FlyBase	mRNA	728412	730566	+	Hsp60B	FBgn0011244	CG2830
chr2L	FlyBase	mRNA	737211	744395	-	Eaat2	FBgn0026438	CG3159
chr2L	FlyBase	mRNA	2203904	2206429	-	CG31668	FBgn0051668	CG31668
chr2L	FlyBase	mRNA	2206796	2208906	-	CG33124	FBgn0053124	CG33124
chr2L	FlyBase	mRNA	2730106	2739833	+	CG31689	FBgn0031449	CG31689
chr2L	FlyBase	mRNA	3334871	3355000	-	E23	FBgn0020445	CG3327
chr2L	FlyBase	mRNA	3745692	3752190	+	CG10019	FBgn0031568	CG10019
chr2L	FlyBase	mRNA	3757631	3759212	+	CG31959	FBgn0051959	CG31959
chr2L	FlyBase	mRNA	3760068	3768191	+	CG31772	FBgn0051772	CG31772
chr2L	FlyBase	mRNA	3771706	3784129	+	bowl	FBgn0004893	CG10021
chr2L	FlyBase	mRNA	3784946	3785515	+	CG31960	FBgn0051960	CG31960
chr2L	FlyBase	mRNA	3785819	3786292	+	CG31958	FBgn0051958	CG31958
chr2L	FlyBase	mRNA	3790663	3802245	+	CG3921	FBgn0031571	CG3921
chr2L	FlyBase	mRNA	5218996	5242606	-	tkv	FBgn0003716	CG14026
chr2L	FlyBase	mRNA	7191402	7194412	-	CG4497	FBgn0031895	CG4497
chr2L	FlyBase	mRNA	9598940	9600892	-	CG4382	FBgn0032132	CG4382
chr2L	FlyBase	mRNA	10348017	10349744	-	CG13141	FBgn0032226	CG13141
chr2L	FlyBase	mRNA	10737347	10740758	+	CG12299	FBgn0032295	CG12299
chr2L	FlyBase	mRNA	10740786	10743934	-	CG6729	FBgn0032296	CG6729
chr2L	FlyBase	mRNA	10744075	10756316	-	CG17124	FBgn0032297	CG17124
chr2L	FlyBase	mRNA	10761147	10764972	+	CG6495	FBgn0027550	CG6495
chr2L	FlyBase	mRNA	14378218	14381170	-	ppk	FBgn0020258	CG3478
chr2L	FlyBase	tRNA	14518091	14518161	+	tRNA:G3:35Ba	FBgn0011862	CR31977
chr2L	FlyBase	tRNA	14518307	14518377	-	tRNA:G3:35Bb	FBgn0011863	CR31978
chr2L	FlyBase	tRNA	14518621	14518691	-	tRNA:G3:35Bc	FBgn0011864	CR31982
chr2L	FlyBase	mRNA	14524926	14525625	+	CG33648	FBgn0053648	CG33648
chr2L	FlyBase	tRNA	14530546	14530616	-	tRNA:G3:35Bd	FBgn0011865	CR31981
chr2L	FlyBase	tRNA	14530854	14530924	-	tRNA:G3:35Be	FBgn0011866	CR31980
chr2L	FlyBase	mRNA	14547520	14549075	-	CG4218	FBgn0028881	CG4218
chr2L	FlyBase	mRNA	14563072	14563726	-	CG3473	FBgn0028913	CG3473
chr2L	FlyBase	tRNA	14598859	14598930	+	tRNA:P:35Ba	FBgn0028912	CR31983
chr2L	FlyBase	tRNA	14599396	14599467	-	tRNA:P:35Bb	FBgn0028911	CR31979
chr2L	FlyBase	tRNA	14599674	14599745	+	tRNA:P:35Bc	FBgn0028910	CR31984
chr2L	FlyBase	mRNA	14599776	14689311	-	osp	FBgn0003016	CG3479
chr2L	FlyBase	mRNA	19366407	19368641	+	CG17349	FBgn0032771	CG17349
chr2L	FlyBase	mRNA	19376859	19379201	+	CG17350	FBgn0032772	CG17350
chr2L	FlyBase	mRNA	19379143	19382128	-	CG15825	FBgn0032773	CG15825
chr2L	FlyBase	mRNA	19382979	19385728	-	CG17549	FBgn0032774	CG17549
chr2L	FlyBase	mRNA	19390089	19391751	+	CG31798	FBgn0051798	CG31798
chr2L	FlyBase	mRNA	20210472	20214429	+	CG41071	FBgn0069952	CG41071
chr2L	FlyBase	mRNA	20213468	20214162	+	CG40463	FBgn0058463	CG40463
chr2L	FlyBase	mRNA	20218854	20220314	-	CG41073	FBgn0069950	CG41073
chr2L	FlyBase	mRNA	20223514	20230985	+	CC40169	FBgn0058169	CG40169
chr2L	FlyBase	mRNA	20233241	20236964	-	CG40172	FBgn0058172	CG40172
chr2L	FlyBase	mRNA	20235816	20241217	+	CG40341	FBgn0058341	CG40341
chr2L	FlyBase	ncRNA	20241401	20241990	-	CR40465	FBgn0058465	CR40465
chr2L	FlyBase	mRNA	21189122	21190335	-	CG31988	FBgn0051988	CG31988
chr2L	FlyBase	mRNA	21194113	21199411	+	clumsy	FBgn0026255	CG8681
chr2L	FlyBase	mRNA	21200282	21208160	-	CG8678	FBgn0032935	CG8678
chr2R	FlyBase	mRNA	3249563	3270529	-	CG30497	FBgn0050497	CG30497
chr2R	FlyBase	mRNA	3766069	3768549	+	CG14760	FBgn0033277	CG14760
chr2R	FlyBase	mRNA	3771144	3771596	+	CG30369	FBgn0050369	CG30369
chr2R	FlyBase	mRNA	3771849	3772229	+	CG14759	FBgn0033278	CG14759
chr2R	FlyBase	mRNA	3772459	3773276	-	CG2291	FBgn0033279	CG2291
chr2R	FlyBase	mRNA	3774501	3775091	-	CG12126	FBgn0033280	CG12126
chr2R	FlyBase	mRNA	3775426	3776239	-	CG30376	FBgn0050376	CG30376
chr2R	FlyBase	ncRNA	3776743	3778897	+	CR30370	FBgn0063356	CR30370
chr2R	FlyBase	mRNA	3777695	3779095	-	CG30375	FBgn0050375	CG30375
chr2R	FlyBase	mRNA	5218097	5219401	+	CG1773	FBgn0033439	CG1773
chr2R	FlyBase	mRNA	5219384	5220352	+	CG10459	FBgn0033440	CG10459
chr2R	FlyBase	mRNA	6925761	6926330	-	CG34054	FBgn0054054	CG34054
chr2R	FlyBase	mRNA	12156103	12163642	+	gprs	FBgn0024232	CG18471
chr2R	FlyBase	mRNA	12165955	12167562	-	Amyrel	FBgn0020506	CG8221
chr2R	FlyBase	mRNA	12168068	12169909	-	Nach	FBgn0024319	CG8178
chr2R	FlyBase	mRNA	12185674	12187688	+	CG5197	FBgn0034147	CG5197
chr2R	FlyBase	mRNA	12188324	12246247	-	CG30463	FBgn0050463	CG30463
chr2R	FlyBase	mRNA	12623710	12629224	+	CG15611	FBgn0034194	CG15611
chr2R	FlyBase	mRNA	12633569	12635166	-	Amy-p	FBgn0000079	CG18730
chr2R	FlyBase	mRNA	12638002	12639090	-	CG10956	FBgn0034195	CG10956
chr2R	FlyBase	mRNA	12639625	12641245	+	Amy-d	FBgn0000078	CG17876
chr2R	FlyBase	mRNA	12641270	12641886	-	CG15605	FBgn0034196	CG15605
chr2R	FlyBase	mRNA	12643696	12645107	+	CG15918	FBgn0034197	CG15918
chr2R	FlyBase	mRNA	13722618	13723161	+	CG30114	FBgn0050114	CG30114
chr2R	FlyBase	mRNA	13747626	13751177	+	fj	FBgn0000658	CG10917
chr2R	FlyBase	mRNA	14029439	14040297	+	CG5226	FBgn0034355	CG5226
chr2R	FlyBase	mRNA	16074019	16077190	-	Mgat1	FBgn0034521	CG13431
chr2R	FlyBase	mRNA	16077898	16096991	-	l(2)05510	FBgn0028622	CG13432
chr2R	FlyBase	mRNA	17090782	17091798	+	CG30222	FBgn0050222	CG30222
chr2R	FlyBase	mRNA	17098029	17099081	+	CG33225	FBgn0053225	CG33225
chr2R	FlyBase	mRNA	18209026	18211980	-	CG30259	FBgn0050259	CG30259
chr2R	FlyBase	mRNA	18210299	18210988	+	Obp59a	FBgn0034766	CG13517
chr2R	FlyBase	mRNA	18212292	18213150	+	Obp58b	FBgn0034768	CG13518
chr2R	FlyBase	mRNA	18213527	18214242	-	Obp58c	FBgn0034769	CG13524
chr2R	FlyBase	mRNA	18214530	18215296	+	Obp58d	FBgn0034770	CG13519
chr2R	FlyBase	mRNA	18215376	18220332	+	CG30275	FBgn0050275	CG30275
chr2R	FlyBase	mRNA	18220358	18224829	+	CG30268	FBgn0050268	CG30268
chr2R	FlyBase	mRNA	18224903	18244423	-	jbug	FBgn0028371	CG30092
chr2R	FlyBase	mRNA	18251012	18268186	-	CG3536	FBgn0034775	CG3536
chr2R	FlyBase	mRNA	18318974	18323585	+	CG3622	FBgn0034778	CG3622
chr2R	FlyBase	mRNA	18326386	18329606	+	CG30271	FBgn0050271	CG30271
chr2R	FlyBase	mRNA	18330728	18332508	+	CG30266	FBgn0050266	CG30266
chr2R	FlyBase	mRNA	18332790	18334427	+	CG30274	FBgn0050274	CG30274
chr2R	FlyBase	mRNA	18501263	18506483	-	CG9896	FBgn0034808	CG9896
chr2R	FlyBase	mRNA	18516754	18517329	-	CG13542	FBgn0034809	CG13542
chr2R	FlyBase	mRNA	18519719	18521601	-	CG9895	FBgn0034810	CG9895
chr2R	FlyBase	mRNA	18588161	18589325	+	Gr59a	FBgn0045483	CG30189
chr2R	FlyBase	mRNA	18589803	18590966	+	Gr59b	FBgn0045482	CG30191
chr2R	FlyBase	mRNA	18593479	18593861	-	CG9877	FBgn0034819	CG9877
chr2R	FlyBase	mRNA	18594862	18595765	+	CG13538	FBgn0034820	CG13538
chr2R	FlyBase	mRNA	18607704	18607973	-	RpL37b	FBgn0034822	CG9873
chr2R	FlyBase	mRNA	18610077	18611333	-	Gr59c	FBgn0041235	CG30186
chr2R	FlyBase	mRNA	18611541	18612769	-	Gr59d	FBgn0041236	CG30330
chr2R	FlyBase	mRNA	19560629	19561577	-	CG13568	FBgn0034965	CG13568
chr2R	FlyBase	mRNA	19563266	19565083	+	CG13563	FBgn0034966	CG13563
chr3L	FlyBase	mRNA	1095366	1095881	-	CG32334	FBgn0052334	CG32334
chr3L	FlyBase	mRNA	1101815	1102518	-	CG32336	FBgn0052336	CG32336
chr3L	FlyBase	mRNA	3604008	3604531	-	CG14974	FBgn0040694	CG14974
chr3L	FlyBase	mRNA	3630698	3636434	+	CG12029	FBgn0035454	CG12029
chr3L	FlyBase	mRNA	3700736	3784820	-	CG32264	FBgn0052264	CG32264
chr3L	FlyBase	mRNA	4047678	4055245	-	wit	FBgn0024179	CG10776
chr3L	FlyBase	mRNA	4052882	4054425	+	CG32259	FBgn0052259	CG32259
chr3L	FlyBase	mRNA	4055562	4057481	-	Faa	FBgn0016013	CG14993
chr3L	FlyBase	mRNA	5787637	5819561	-	vn	FBgn0003984	CG10491
chr3L	FlyBase	mRNA	5856354	5857739	+	CG13287	FBgn0035643	CG13287
chr3L	FlyBase	mRNA	5864834	5865311	+	CG32408	FBgn0052408	CG32408
chr3L	FlyBase	mRNA	7557454	7561135	+	CG14838	FBgn0035799	CG14838
chr3L	FlyBase	mRNA	7562679	7564945	-	CG7716	FBgn0035800	CG7716
chr3L	FlyBase	mRNA	9516187	9517946	-	CG12525	FBgn0036010	CG12525
chr3L	FlyBase	mRNA	10937648	10937998	-	CG32070	FBgn0052070	CG32070
chr3L	FlyBase	mRNA	12798829	12817052	-	CG10960	FBgn0036316	CG10960
chr3L	FlyBase	mRNA	13944296	13950767	-	CG17364	FBgn0036391	CG17364
chr3L	FlyBase	mRNA	14156136	14198509	+	nuf	FBgn0013718	CG33991
chr3L	FlyBase	mRNA	21160760	21198462	+	Eip78C	FBgn0004865	CG18023
chr3L	FlyBase	mRNA	21205047	21207941	-	AcCoAS	FBgn0012034	CG9390
chr3L	FlyBase	mRNA	21277896	21288772	+	CG32436	FBgn0052436	CG32436
chr3L	FlyBase	mRNA	21289118	21290336	-	CG12971	FBgn0037078	CG12971
chr3L	FlyBase	mRNA	21291524	21293708	+	CG32437	FBgn0052437	CG32437
chr3L	FlyBase	mRNA	21294020	21295070	+	CG32440	FBgn0052440	CG32440
chr3L	FlyBase	mRNA	21896203	21903508	+	CS-2	FBgn0029091	CG7464
chr3L	FlyBase	mRNA	21905842	21916634	+	CG7470	FBgn0037146	CG7470
chr3R	FlyBase	mRNA	4349668	4351846	+	CG31259	FBgn0051259	CG31259
chr3R	FlyBase	mRNA	4526704	4540990	+	CG8112	FBgn0037612	CG8112
chr3R	FlyBase	mRNA	11333781	11334560	-	CG14872	FBgn0038346	CG14872
chr3R	FlyBase	mRNA	11356239	11357195	-	CG31296	FBgn0051296	CG31296
chr3R	FlyBase	mRNA	11357859	11363010	-	CG18522	FBgn0038347	CG18522
chr3R	FlyBase	mRNA	11363565	11368111	-	CG18519	FBgn0038348	CG18519
chr3R	FlyBase	mRNA	11368474	11373457	-	CG6045	FBgn0038349	CG6045
chr3R	FlyBase	mRNA	11374350	11378494	-	CG18516	FBgn0038350	CG18516
chr3R	FlyBase	mRNA	11458605	11464977	+	CG5302	FBgn0038351	CG5302
chr3R	FlyBase	mRNA	11491908	11513658	+	pxb	FBgn0053207	CG33207
chr3R	FlyBase	tRNA	13934359	13934430	+	CR31242	FBgn0051242	CR31242
chr3R	FlyBase	tRNA	13934715	13934786	+	CR31518	FBgn0051518	CR31518
chr3R	FlyBase	mRNA	21823343	21824358	+	HLHmdelta	FBgn0002734	CG8328
chr3R	FlyBase	mRNA	21825580	21826421	+	HLHmgamma	FBgn0002735	CG8333
chr3R	FlyBase	mRNA	21830648	21831745	-	HLHmbeta	FBgn0002733	CG14548
chr3R	FlyBase	mRNA	21836685	21837101	+	malpha	FBgn0002732	CG8337
chr3R	FlyBase	mRNA	21840447	21841183	+	m1	FBgn0002578	CG8342
chr3R	FlyBase	mRNA	21842231	21843192	-	m2	FBgn0002592	CG6104
chr3R	FlyBase	mRNA	21854572	21855457	-	HLHm5	FBgn0002631	CG6096
chr3R	FlyBase	mRNA	21858633	21859769	+	m6	FBgn0002632	CG8354
chr3R	FlyBase	mRNA	21862760	21863482	+	HLHm7	FBgn0002633	CG8361
chr3R	FlyBase	mRNA	21866046	21866585	+	E(spl)	FBgn0000591	CG8365
chr3R	FlyBase	mRNA	22707456	22736719	+	T48	FBgn0004359	CG5507
chr3R	FlyBase	mRNA	22726086	22726484	-	CG31078	FBgn0051078	CG31078
chr3R	FlyBase	mRNA	24998986	25020716	-	CG14509	FBgn0039647	CG14509
chr3R	FlyBase	mRNA	27577531	27580413	-	CG2196	FBgn0039872	CG2196
chr3R	FlyBase	ncRNA	27593695	27595156	+	pncr017:3L	FBgn0046756	CR33945
chr4	FlyBase	mRNA	1109068	1133567	+	sv	FBgn0005561	CG11049
chrX	FlyBase	mRNA	626849	640132	+	fz3	FBgn0027343	CG16785
chrX	FlyBase	mRNA	641612	644865	+	Pomt2	FBgn0025618	CG12311
chrX	FlyBase	mRNA	644670	646910	-	CG13360	FBgn0025620	CG13360
chrX	FlyBase	mRNA	1144867	1145544	+	CG32812	FBgn0025642	CG32812
chrX	FlyBase	mRNA	1146528	1153200	-	DAAM	FBgn0025641	CG14622
chrX	FlyBase	mRNA	1154919	1155717	-	CG32811	FBgn0052811	CG32811
chrX	FlyBase	mRNA	1165229	1165648	-	CG18091	FBgn0024368	CG18091
chrX	FlyBase	mRNA	1179346	1186275	+	fs(1)N	FBgn0004650	CG11411
chrX	FlyBase	mRNA	1186335	1190517	-	CG11409	FBgn0024366	CG11409
chrX	FlyBase	mRNA	1844908	1846285	-	CG32802	FBgn0052802	CG32802
chrX	FlyBase	mRNA	1849379	1850350	+	CG3600	FBgn0026087	CG3600
chrX	FlyBase	mRNA	1853743	1860251	+	Hr4	FBgn0023546	CG16902
chrX	FlyBase	mRNA	1864060	1865499	-	CG4406	FBgn0023545	CG4406
chrX	FlyBase	mRNA	3640100	3642576	+	Crg-1	FBgn0021738	CG32788
chrX	FlyBase	mRNA	3642734	3644132	-	CG33221	FBgn0053221	CG33221
chrX	FlyBase	mRNA	3644385	3646811	+	CG32789	FBgn0052789	CG32789
chrX	FlyBase	mRNA	3647794	3648990	+	CG32779	FBgn0052779	CG32779
chrX	FlyBase	tRNA	3664936	3665007	+	CR32785	FBgn0052785	CR32785
chrX	FlyBase	tRNA	3672859	3672930	+	tRNA:P:3E	FBgn0025118	CR32784
chrX	FlyBase	mRNA	3673539	3676117	+	CG2901	FBgn0029679	CG2901
chrX	FlyBase	mRNA	3681333	3702862	+	ec	FBgn0000542	CG2904
chrX	FlyBase	mRNA	3814235	3816585	-	CG6414	FBgn0029690	CG6414
chrX	FlyBase	mRNA	3915559	3921189	+	CG33220	FBgn0053220	CG33220
chrX	FlyBase	mRNA	3923112	3924451	+	CG32790	FBgn0052790	CG32790
chrX	FlyBase	mRNA	3925374	3932034	+	CG32778	FBgn0052778	CG32778
chrX	FlyBase	mRNA	4490364	4492651	-	HLH4C	FBgn0011277	CG3052
chrX	FlyBase	mRNA	8302242	8302796	-	CG32713	FBgn0052713	CG32713
chrX	FlyBase	mRNA	8303719	8306130	-	CG15347	FBgn0030040	CG15347
chrX	FlyBase	mRNA	8818135	8894208	-	CG10962	FBgn0030073	CG10962
chrX	FlyBase	mRNA	8871437	8872856	+	CG32709	FBgn0052709	CG32709
chrX	FlyBase	mRNA	8894480	8896168	+	CG33224	FBgn0053224	CG33224
chrX	FlyBase	mRNA	8896316	8898557	+	CG4040	FBgn0030076	CG4040
chrX	FlyBase	mRNA	8900268	8903287	-	CG15365	FBgn0030077	CG15365
chrX	FlyBase	mRNA	13903478	13903666	+	CG12454	FBgn0040870	CG12454
chrX	FlyBase	tRNA	13904578	13904659	+	tRNA:S474:12Eh	FBgn0011974	CR32615
chrX	FlyBase	mRNA	15496522	15497256	+	CG8119	FBgn0030664	CG8119
chrX	FlyBase	mRNA	15501999	15503231	-	CG15646	FBgn0030665	CG15646
chrX	FlyBase	mRNA	15509438	15511674	+	CG12708	FBgn0030666	CG12708
chrX	FlyBase	mRNA	15897678	15904241	+	dpr18	FBgn0030723	CG14948
chrX	FlyBase	mRNA	17247734	17256092	-	CG8611	FBgn0027602	CG8611
chrX	FlyBase	mRNA	17256793	17257063	-	CG12994	FBgn0040877	CG12994
chrX	FlyBase	mRNA	17257528	17262671	+	CG5613	FBgn0030839	CG5613
chrX	FlyBase	mRNA	18092771	18093393	-	CG15059	FBgn0030905	CG15059
chrX	FlyBase	mRNA	18158176	18190025	-	CG6123	FBgn0030913	CG6123
chrX	FlyBase	mRNA	18192820	18195899	+	CG6106	FBgn0030914	CG6106
chrX	FlyBase	mRNA	21015986	21091847	-	CG32521	FBgn0052521	CG32521
* See Supplemental Materials for the details of definition of High- and Low-confidence PcG targets
