# Supplementary material for: Alternative Epigenetic Chromatin States of Polycomb Target Genes
Source: PLoS Genet. 2010 Jan 8;6(1):e1000805. doi: 10.1371/journal.pgen.1000805 (PMC2799325; doi:10.1371/journal.pgen.1000805)
Supplement: Table S11 — List of oligonucleotide primers used in this work. (0.02 MB XLS) [file pgen.1000805.s023.xls]

## Sheet: Sheet1
Table S11. The list of oligonucleotide primers
amplicone name	locus	Forward primer	Reverse primer
RT-qPCR
RP49	RpL32	GAAGAAGCGCACCAAGGACT	AACGCGGTTCTGCATGAGCA
inv-1	inv	TAACAATGAAAATCTGCACG	GATCTGTTGCCATTGGTATT
en-1	en	CCAACTTCCTTAACTGCTTC	GAGCAGATTTCTCTGGATTG
AT2L-1	M(2)21AB	CTTCACCAAGGTTGACAGAT	AGAAGTTCCGTAGTCGAACA
AT2L-2	CG17347	CGTTGACTACCATGGATCTT	CGTTGACTACCATGGATCTT
AT2R-1	bonsai	TACTGCGAAAACCTAAAGGA	TCTTCTCTTCTGTCACGGTC
AT3L-1	RpL10Ab	AAGTCCTATGATGCCTTCCT	TTGATGGTCGACTTAACCTC
AT3R-1	CG5270	CGTCTAGTGGTTGATTCCAT	CAGGACCAAAAGTTTAGTGG
AT3R-2	Dad	ATCCACACTTACGATTCCAG	ATCTAGGCGACTCTTGACTG
ATX-1	CG2974	TTGAATAGTTCCTGGTCCAC	GATTTGGCTCTTCCTTGAG
ATX-3	mRpL49	GAGCTGGACAAGTATCCTGA	ACATGGTAACCCAGTTCTGA
IT2L-1	syt	ATTTAAAACCGGAAAGATCC	AATTTGTTGTTGTCCCAAAC
IT3L-1	CG5687	TTCTGGAAGAAGCCATAGAA	AGCCTTCAAGAATCAACAGA
IT3L-2	FR	GAGGTCCTGACTGTCACCTA	GCTAGGGTGAGAAAGGGTAT
IT3L-3	Lkr	ATGCAGAGGTTTGAAGTTGT	GGCATTTACAACGGAAGTAG
IT3L-4	CG32026	AAGTTTACAGTGGGTTCTCG	GGAGTTGTATCCTTGTCTGG
IT3L-5	nwk	AGGTGTTTCAACAGCAAATC	ACAATGCTCTTCGTCAAAGT
IT3R-3	CG11843	GAGACTATATGGTTGCAGGG	GCTATGAAGGAGTCGGAAG
ITX-1	CG9072	TGTGCCTTTTTGAGCACT	TAACGTCTACTCGGATCCAC
C15.3	C15	TATCACGCCTGCTATCCAAG	CGGATACGAGTATAGTGCTG
slp5	slp2	CGTCAGAGTTCCGAGAAGC	TGCCCTTGCCAGGATCATC
hth-RE-ex1	hth	GGGGCCTGACTAAGAACTAT	AAAGCAAATCGAAAACTACG
Lim1-ex1	Lim1	GTAGCCGAACTCGAACTTG	ATGAAACAAATCACCAGCAT
PCSEX-1	Psc	TCCATTGACCATTCGCACAG	TTTCACCTTGATGGGTTTCAG
pnr-ex1	pnr	CCTGAGCAACGGAACTC	ACATAGTCGTAGTTGGTGGC
ph-p-ex1	ph-p	CTTTCGAAGGTGTCTCTTTG	ACCTCGATGATGAATGCTAC
B-ex1	Abd-B	CAACTACCGAACTAAGCTGC	CACAATGAGGAGCAAGGATG
mirr-ex1	mirr	GGATAACCACCCAGAGCTA	CCGTAGAAGCCACGATATAA
Scr-ex1	Scr	GAGATGTACTCGCTTCATCC	GCTTGAACAACAACCACAG
Antp-ex1	Antp	TAATTTTGTGCTTTGGGATT	GAACATAGGAACAGGAACCA
Poxm-ex1	Poxm	GGCTGGTAGATGGAGTTGTA	TTAATCTGAGCAATCTGGGT
CG4136-ex1	CG4136	GAATACGGATTGTATGGAGC	GTAGCTGGTGTTCGTATCGT
zfh1-ex1	zfh1	GCTAGTGATGGATATCGAGG	GTTTGACGTTCCTCTGCTAC
Sox100B-ex1	Sox100B	CAGTCTTTTGCTAAGGCAAC	TTGATGTTCTCCAGGAAGTC
ct-ex1	ct	TATCCAAGTTCCCTACATGG	AGTATTGAATTGCTTAGCGG
srp-ex1	srp	CTTATGGTCACCTCAACACC	CCTCCGGAGTCAGGTAGTA
pnt-ex1	pnt	GACCCAAGGTGCTCATATAC	GGAGTTCTATGGCAGTTACG
CG31647-ex1	CG31647	CGTCTCATTAGCTTGCTTTT	ACTTCCAACGATTTTCGAC
gsb-ex1	gsb	GCCTTTACAGTTCACAGAGC	CATAAACTCGCTTCCAGTTC
Doc2-ex1	Doc	CACATCCAGTTCGAGTTCTT	GTACCTACTTTGGGAGACCC
mab-2-ex1	mab	CATATTGGGCAGGAAGTAGT	GAAGACCCTGCTGCTCTAC
oc-ex2	oc	GGTACTGATTGTGCCAGAAG	AATATCACACCGATGGACAG
hh-ex1	hh	ACACAAACGTGAGCTTCTG	CTACAGCGAAGTGATCCTCT
tiptop-ex1	tiptop	GCAGCACTACACGAATATCA	GGCCTGATCACAAACTTTAC
Preparation of DNA template for dsRNAi synthesis*
Trx-Ri1	trx	CTAATACGACTCACTATAGGGAGCAAACGTCTACCACCACCC	CTAATACGACTCACTATAGGGAGGCCCATTAGCGTGGTATCC
EZ-Ri1	E(z)	CTAATACGACTCACTATAGGGAGTACAGGATCTGTACTGCGAG	CTAATACGACTCACTATAGGGAGGCTTGTCCTTGACTTCTTCC
ASH1-Ri2	ash1	CTAATACGACTCACTATAGGGAGgcagtgccatggagaccc	CTAATACGACTCACTATAGGGAGcaacacccagcagcgtcc
PC-Ri1	Pc	CTAATACGACTCACTATAGGGAGAGTACCGTGTCAAGTGGAAG	CTAATACGACTCACTATAGGGAGTTTGGTATGTTATTGTTCTCGG
LacZ-Ri1		CTAATACGACTCACTATAGGGAGGGCCACCGATATTATTTGCC	CTAATACGACTCACTATAGGGAGCACACTGAGGTTTTCCGC
*nucleotides in bold correspond to T7 promoter
